# Supplementary material for: Tuning the electronic structure of Pd by the surface configuration of Al2O3 for hydrogenation reactions
Source: Royal Society of Chemistry journal article supplement (doi:10.1039/d3nr05258c), 2023-11-23
Supplement: d3nr05258c1.pdf [file d3nr05258c1.pdf]

## Supporting Information

### **Tuning Electronic Structure of Pd by Surface Configuration of Al<sub>2</sub>O<sub>3</sub> for Hydrogenation Reactions**

Yinglei Liu<sup>a</sup>, Chicheng Ma<sup>a</sup>, Jiye Zhang<sup>a</sup>, Huiying Zhou<sup>a</sup>, Gaowu Qin<sup>a,b</sup>, Song Li<sup>a,\*</sup>

<sup>a</sup>Key Lab for Anisotropy and Texture of Materials (MoE), School of Materials Science and Engineering, Northeastern University, Shenyang 110819, China

<sup>b</sup>Institute of Materials Intelligent Technology, Liaoning Academy of Materials, Shenyang 110004, China

\*Email: [lis@atm.neu.edu.cn](mailto:lis@atm.neu.edu.cn)

## Figure and table captions

Figure S1 TG-DTA curves of (a)  $\text{Al}(\text{OH})_3$  and (b)  $\text{AlOOH}$  in air flow.

Figure S2  $^{27}\text{Al}$  MAS NMR of  $\gamma\text{-Al}_2\text{O}_3$  and  $\eta\text{-Al}_2\text{O}_3$ .

Figure S3  $\text{N}_2$  sorption isotherm and pore size distributions of  $\gamma\text{-Al}_2\text{O}_3$  (a and b) and  $\eta\text{-Al}_2\text{O}_3$  (c and d).

Figure S4 TPD profiles of supports and Pd supported catalysts: (a) and (b)  $\text{NH}_3$ , (c) and (d)  $\text{CO}_2$ .

Figure S5 FT-IR spectra of OH groups on the surface of supports and catalysts.

Figure S6 Selectivity of nitrobenzene hydrogenation of  $\text{Pd}/\gamma\text{-Al}_2\text{O}_3$  and  $\text{Pd}/\eta\text{-Al}_2\text{O}_3$ .

Figure S7 Recycling stability of  $\text{Pd}/\gamma\text{-Al}_2\text{O}_3$  in the hydrogenation of nitrobenzene.

Figure S8 DF-STEM images, HR-TEM images and Pd size histograms of the used  $\text{Pd}/\gamma\text{-Al}_2\text{O}_3$  and  $\text{Pd}/\eta\text{-Al}_2\text{O}_3$  after the hydrogenation of nitrobenzene.

Figure S9 XPS spectra of the used catalysts after the hydrogenation of nitrobenzene.

Figure S10 Recycling stability of  $\text{Pd}/\eta\text{-Al}_2\text{O}_3$  in the hydrogenation of phenylacetylene.

Table S1 Possible configuration and net charge on the  $\gamma\text{-Al}_2\text{O}_3$  and  $\eta\text{-Al}_2\text{O}_3$ .

Table S2 Acidity and basicity of supports and Pd supported catalysts.

Table S3 The proportions of OH groups in the XPS spectra of Al 2p and O 1s.

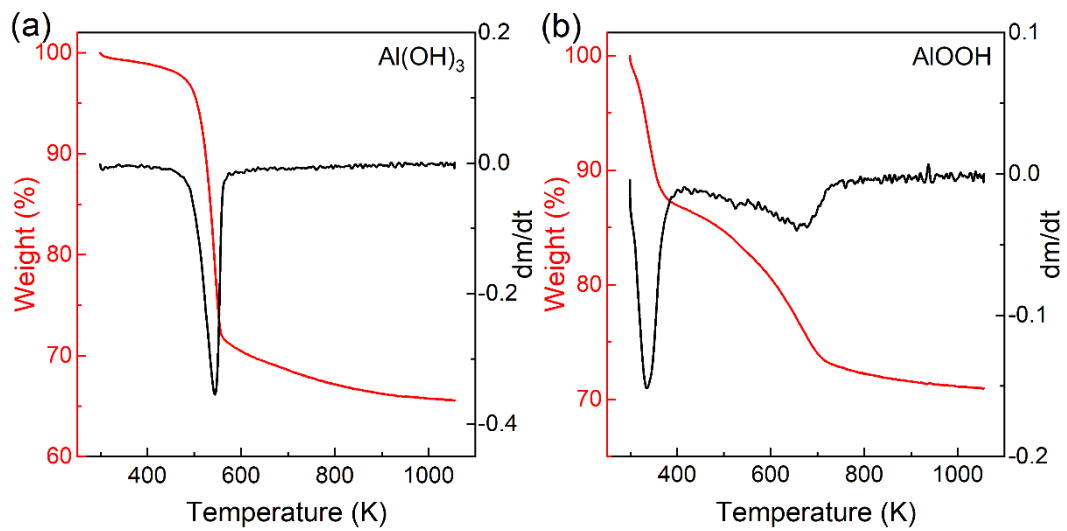

Figure S1 TG-DTA curves of (a) Al(OH)<sub>3</sub> and (b) AlOOH in air flow.

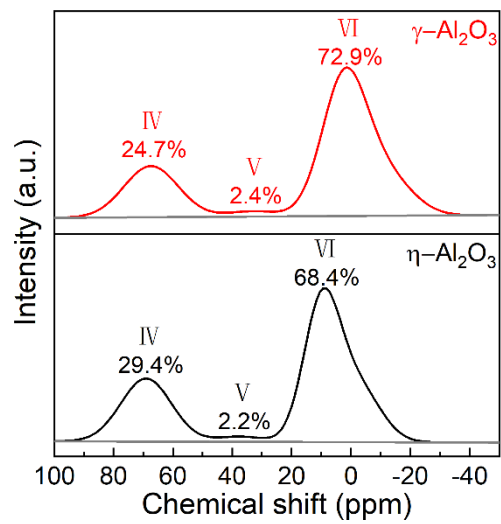

Figure S2  $^{27}\text{Al}$  MAS NMR of  $\gamma\text{-Al}_2\text{O}_3$  and  $\eta\text{-Al}_2\text{O}_3$ .

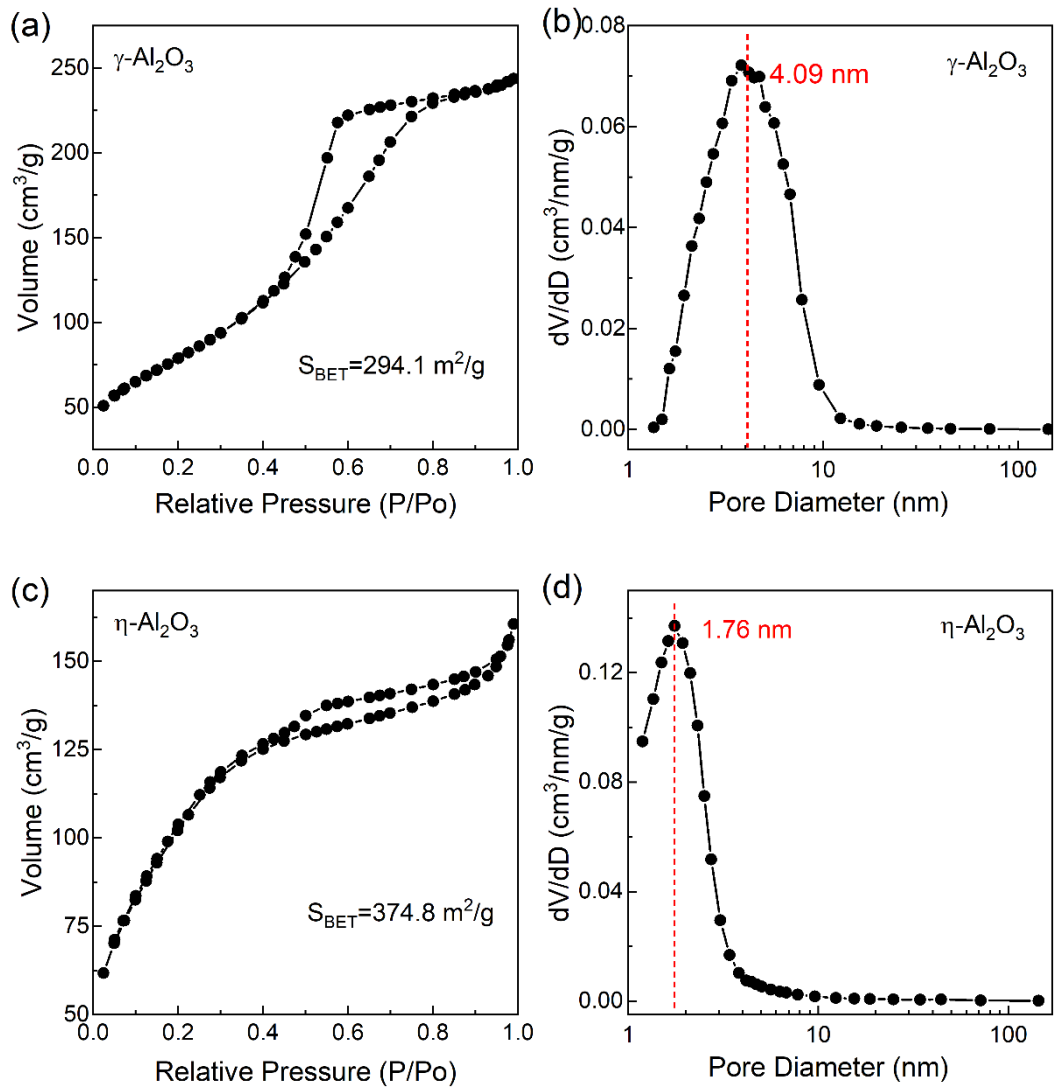

Figure S3 N<sub>2</sub> sorption isotherm and pore size distributions of  $\gamma\text{-Al}_2\text{O}_3$  (a and b) and  $\eta\text{-Al}_2\text{O}_3$  (c and d).

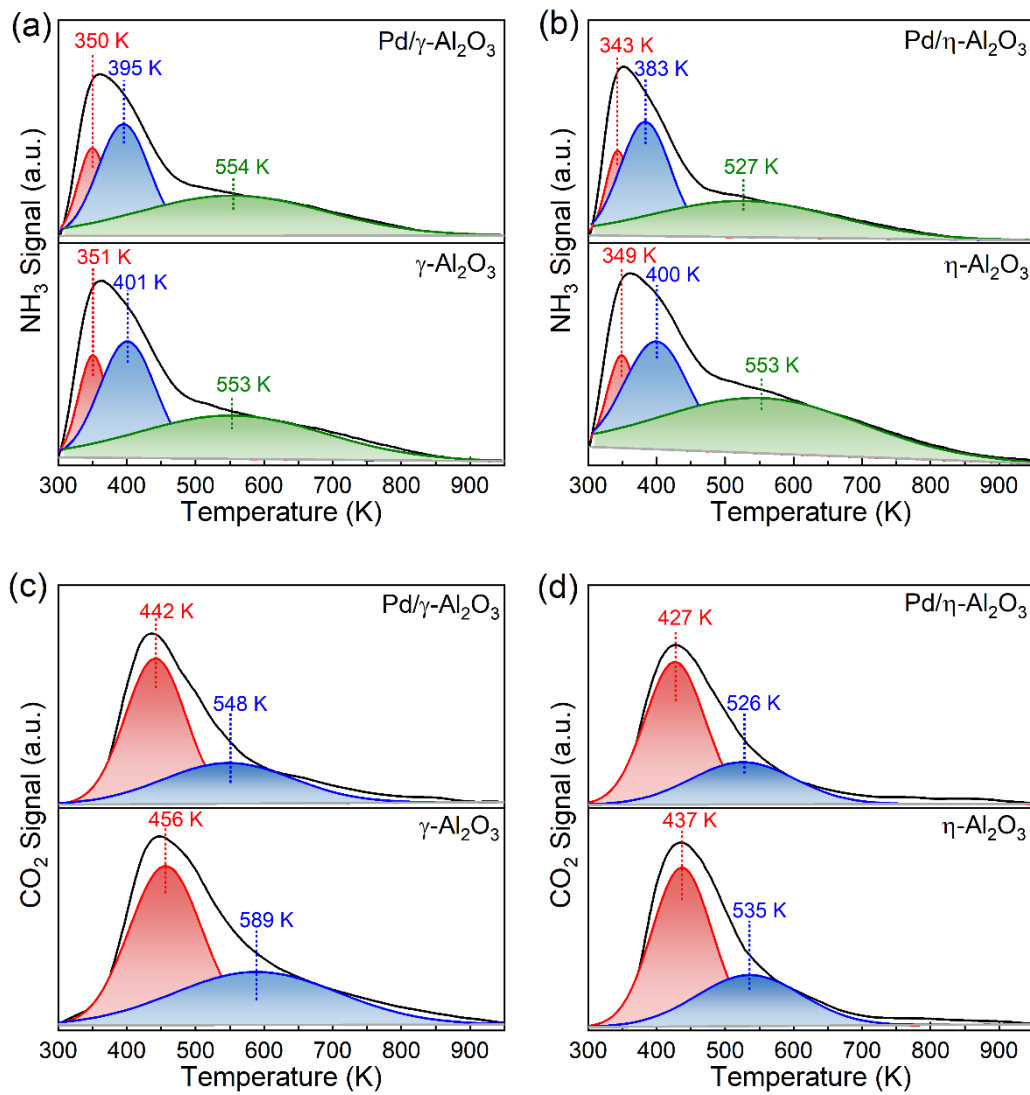

Figure S4 TPD profiles of supports and Pd supported catalysts: (a) and (b)  $\text{NH}_3$ , (c) and (d)  $\text{CO}_2$ .

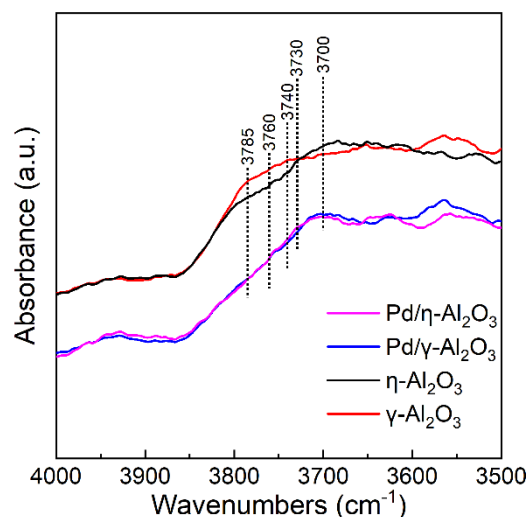

Figure S5 FT-IR spectra of OH groups on the surfaces of supports and catalysts.

There are five types of OH stretching vibrations within the frequency range of 3700-3800  $\text{cm}^{-1}$ .<sup>1-3</sup> The band at 3785  $\text{cm}^{-1}$  corresponds to a terminal OH group coordinated with an octahedral  $\text{Al}^{3+}$  ion, while the band at 3760  $\text{cm}^{-1}$  corresponds to a terminal OH group coordinated with a tetrahedral  $\text{Al}^{3+}$  ion. The band at 3740  $\text{cm}^{-1}$  is assigned to a bridging OH group that links two octahedral  $\text{Al}^{3+}$  ions. The three OH configurations are more abundant on  $\gamma\text{-Al}_2\text{O}_3$  and act as the sites accepting H-bonds. The bands at 3730  $\text{cm}^{-1}$  and 3700  $\text{cm}^{-1}$  are attributed to the stretching vibrations of a bridging OH group, which links an octahedral and a tetrahedral  $\text{Al}^{3+}$  ions, as well as a OH group coordinated to three  $\text{Al}^{3+}$  ions in octahedral interstices. The two types of OH configurations, which serve as H-bond donors, are more abundant on  $\eta\text{-Al}_2\text{O}_3$ . Loading Pd onto the supports results in a decrease in the intensity of OH vibration bands, and the similar spectra between Pd/ $\gamma\text{-Al}_2\text{O}_3$  and Pd/ $\eta\text{-Al}_2\text{O}_3$  eliminate the influence of OH groups on the catalytic performance in the hydrogenation reactions.

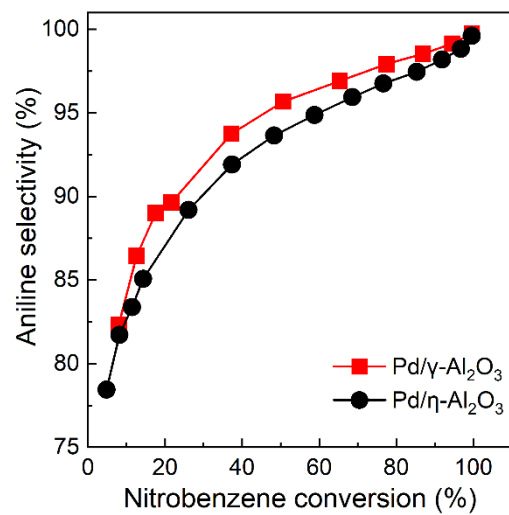

Figure S6 Selectivity of nitrobenzene hydrogenation of Pd/γ-Al<sub>2</sub>O<sub>3</sub> and Pd/η-Al<sub>2</sub>O<sub>3</sub>.



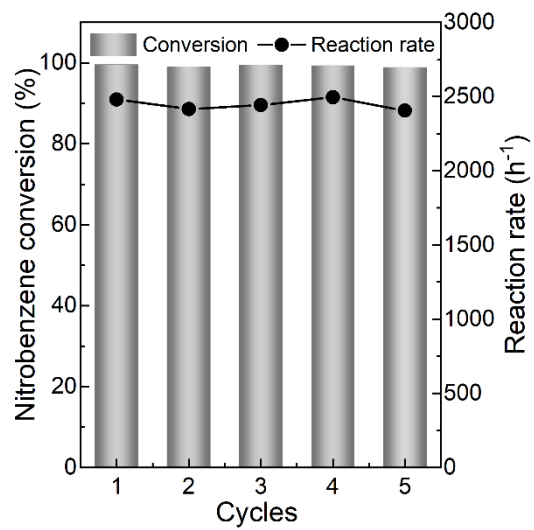

Figure S7 Recycling stability of Pd/ $\gamma$ -Al<sub>2</sub>O<sub>3</sub> in the hydrogenation of nitrobenzene.

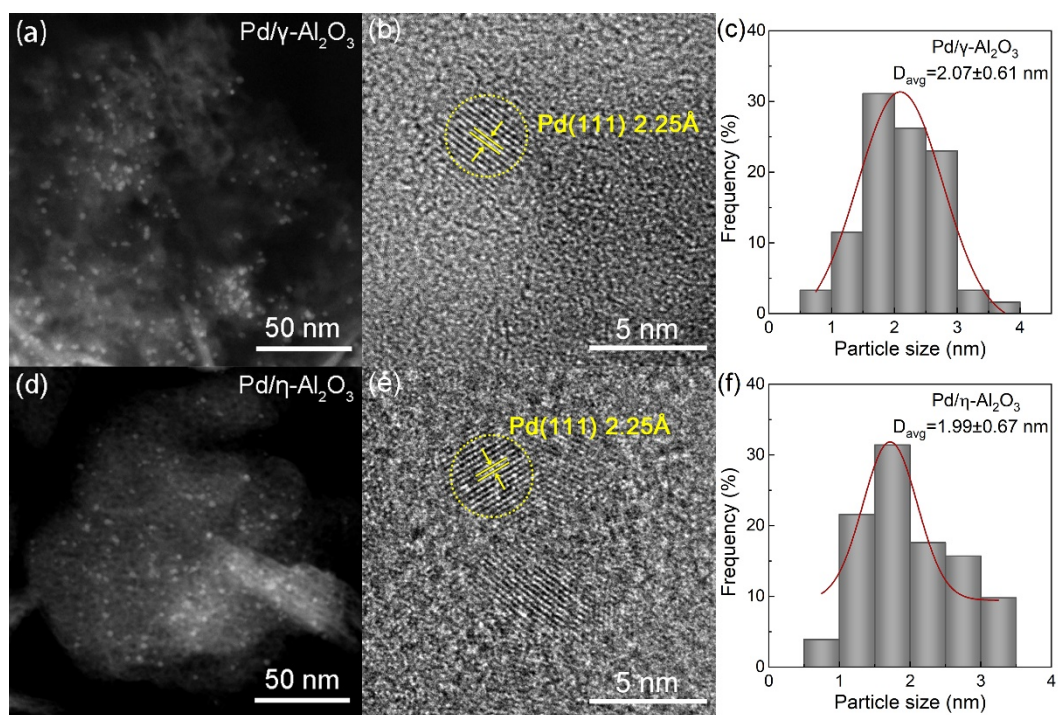

Figure S8 DF-STEM images, HR-TEM images and Pd size histograms of the used Pd/γ-Al<sub>2</sub>O<sub>3</sub> (a, b, c) and Pd/η-Al<sub>2</sub>O<sub>3</sub> (d, e, f) after the hydrogenation of nitrobenzene.

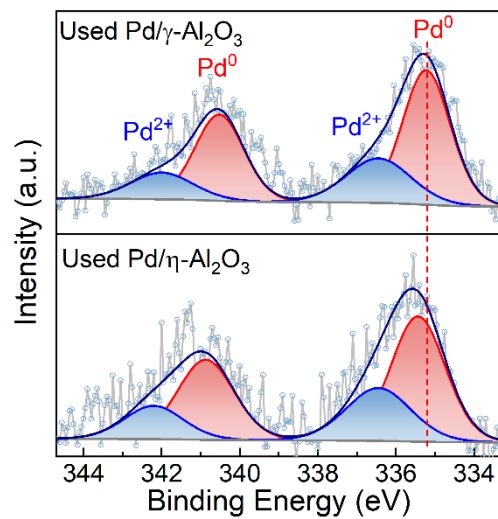

Figure S9 XPS spectra of the used catalysts after the hydrogenation of nitrobenzene.

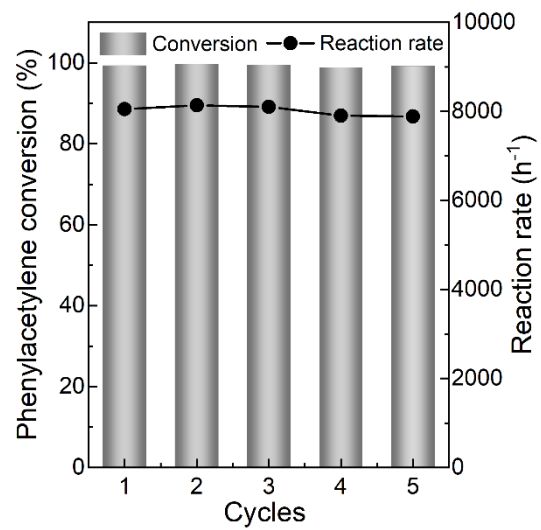

Figure S10 Recycling stability of Pd/ $\eta$ -Al<sub>2</sub>O<sub>3</sub> in the hydrogenation of phenylacetylene.

Table S1 Possible configuration and net charge on the  $\gamma$ -Al<sub>2</sub>O<sub>3</sub> and  $\eta$ -Al<sub>2</sub>O<sub>3</sub>.<sup>2</sup>

| Acid sites                                                  |            |               | Basic sites                            |            |                |
|-------------------------------------------------------------|------------|---------------|----------------------------------------|------------|----------------|
| Configuration                                               | Net charge | Acid strength | Configuration                          | Net charge | Basic strength |
| Al <sup>VI</sup> -OH-Al <sup>VI a</sup>                     | 0          | Weak          | Al <sup>IV</sup> -OH                   | -1/4       | Weak           |
| Al <sup>VI</sup> -OH-Al <sup>IV b</sup>                     | +1/4       | Weak          | Al <sup>VI</sup> -OH                   | -1/2       | Weak           |
| Al <sup>VI</sup> -OH-Al <sup>VI b</sup><br>Al <sup>VI</sup> | +1/2       | Moderate      | Al <sup>VI</sup> -O-Al <sup>IV b</sup> | -3/4       | Strong         |
| Al <sup>VI</sup> -□                                         | +1/2       | Moderate      | Al <sup>VI</sup> -O-Al <sup>VI a</sup> | -1         | Strong         |
| Al <sup>IV</sup> -□ <sup>b</sup>                            | +3/4       | Strong        |                                        |            |                |

<sup>a</sup> More abundant for  $\gamma$ -Al<sub>2</sub>O<sub>3</sub>

<sup>b</sup> More abundant for  $\eta$ -Al<sub>2</sub>O<sub>3</sub>

Table S2 Acidity and basicity of supports and Pd supported catalysts.

| Samples                            | Acidity ( $\mu\text{mol NH}_3/\text{g}$ ) |      |        | Basicity ( $\mu\text{mol CO}_2/\text{g}$ ) |      |        |
|------------------------------------|-------------------------------------------|------|--------|--------------------------------------------|------|--------|
|                                    | Total                                     | Weak | Strong | Total                                      | Weak | Medium |
| $\gamma\text{-Al}_2\text{O}_3$     | 200                                       | 89   | 111    | 471                                        | 268  | 203    |
| Pd/ $\gamma\text{-Al}_2\text{O}_3$ | 187                                       | 81   | 106    | 344                                        | 215  | 129    |
| $\eta\text{-Al}_2\text{O}_3$       | 247                                       | 96   | 151    | 357                                        | 228  | 129    |
| Pd/ $\eta\text{-Al}_2\text{O}_3$   | 172                                       | 80   | 92     | 309                                        | 204  | 105    |

Table S3 The proportions of OH groups in the XPS spectra of Al 2p and O 1s.

|                                              | Al 2p | O 1s  |
|----------------------------------------------|-------|-------|
| $\gamma$ -Al <sub>2</sub> O <sub>3</sub>     | 28.5% | 34.5% |
| Pd/ $\gamma$ -Al <sub>2</sub> O <sub>3</sub> | 17.5% | 27.3% |
| $\eta$ -Al <sub>2</sub> O <sub>3</sub>       | 25.1% | 27.5% |
| Pd/ $\eta$ -Al <sub>2</sub> O <sub>3</sub>   | 19.3% | 23.8% |

## References

- 1 H. Knözinger and P. Ratnasamy, *Catal. Rev. Sci. Eng.*, 1978, **17**, 31–70.
- 2 P.O. Scokart and P.G. Rouxhet, *J. Colloid Interface Sci.*, 1982, **86**, 96–104.
- 3 H. Knozinger, *Studies in Surface Science and Catalysis*, 1985, **20**, 111–125.
